# Supplementary material for: Direct contact between iPSC-derived macrophages and hepatocytes drives reciprocal acquisition of Kupffer cell identity and hepatocyte maturation
Source: eLife. 2026 Jun 29;14:RP108938. doi: 10.7554/eLife.108938 (PMC13313687; doi:10.7554/eLife.108938)
Supplement: Figure 4—source data 1. [file elife-108938-fig4-data1.xlsx]

## Sheet: Sheet1
Drug	Cmax/	DILIrank [64]	DILIst [65]	Known immune-mediated effects [43-45]	Reported human responses	Reported in vivo (murine) responses
	(μM)
DIC	8.0 [Chen et al., 2016]	most	1	ü	IL-6↓ [Verma et al., 2009]
					IL-10↑ [Mahdy et al., 2002]
SLD	32.0 [Chen et al., 2016]	most	1	ü	Mechanistic IL-6↓ [Kang et al., 2001]	TNFα↑ [Zou et al., 2009]
LFM	24.8 [Li et al., 2002]	most	1	ü		Cytokines↓ via NF-kB [Yao et a., 2004; Manna and Aggarwal, 1999]
LTG	9.8 [Agabeyoglu and Incecayir, 2009]	most	1	ü	IL-6↑[Steuerwald et al., 2013]
AQ	0.1 [Ademisoye et al., 2018]	/	1	ü	IL-6↑ [Steuerwald et al., 2013]
PEN	/	less	1	×
PZA	406.9 [Bareggi et al., 1987]	less	1	×
